# Supplementary material
Source: PubMed Central journal article supplement (PMC6544894)
Supplement: rsif20190038supp1.pdf [file rsif20190038supp1.pdf]

# Spatiotemporal Integration in Plant Tropisms

## SUPPLEMENTARY MATERIAL

Yasmine Meroz,<sup>1,2,\*</sup> Renaud Bastien,<sup>3</sup> and L. Mahadevan<sup>4,†</sup>

<sup>1</sup>*School of Engineering and Applied Sciences, Harvard University, Cambridge, MA, 02138*

<sup>2</sup>*School of Plant Science and Food Security, Tel Aviv University, Tel Aviv, Israel*

<sup>3</sup>*Department of Collective Behaviour, Max Planck Institute for Ornithology*

*and Department of Biology, University of Konstanz, Konstanz, Germany*

<sup>4</sup>*School of Engineering and Applied Sciences, and Departments of Physics,  
and Organismic and Evolutionary Biology, Harvard University, Cambridge MA, USA*

### I. TIME AND SPACE INTEGRATION

We note that  $\frac{\partial\theta(s,t)}{\partial s} \equiv \kappa(s,t)$  is the local curvature, and we can rewrite Eq. 2

$$\frac{\partial\kappa(s,t)}{\partial t} = -\gamma\kappa(s,t) - \int_{-\infty}^t \beta(\tau)\mu(t-\tau)\sin(\theta(s,\tau) - \theta_p)d\tau. \quad (1)$$

We use a simple explicit Euler scheme to integrate Eq. 1 over time, for each point  $s$  along the organ. The organ is set to size  $L = 1$ , and is divided into  $NL = 100$  bins, i.e. each segment size is  $ds = L/NL = 0.01$ . The time step is fixed at  $dt = 0.005$ . Within the Euler scheme, we generally have  $\kappa(s, t+1) = \kappa(s, t) + dt \cdot \frac{\partial\kappa(s,t)}{\partial t}$ , where we substitute the derivative with the right-hand-side of Eq. 1, yielding:

$$\kappa(t+1, s) = \kappa(t, s) + dt \cdot (-\gamma\kappa(t, s) - \sum_{n=0}^N dt\beta(t-n)\sin(\theta(s, n) - \frac{\pi}{2})e^{(-ndt/\tau_c)}). \quad (2)$$

Here we demonstrated the case of an exponential response function. After each time step we also integrate the derived curvature over space, in order to get the local angle, since  $\theta(s, t) = \theta(s=0, t) + \int_{s'=0}^s \kappa(s', t)ds'$ . We therefore loop over the organ segments  $s = 0, \dots, NL$ :

$$\theta(s, t) = \theta(s-1, t) + ds \cdot \kappa(s, t) \quad (3)$$

### II. ANALYTIC CALCULATION OF THE RESPONSE FUNCTION

In order to extract the form of the kernel response function from the kinematics of tropic responses, we solve

Eq. 2 for the case of a pulse stimulus, by substituting  $\beta(t) = \beta_0\delta(t_0 = 0)$  in the linearized limit (i.e we substitute  $\sin(\theta(s, t) - \theta_p)$  with  $(\theta(s, t) - \theta_p)$ . Since we know that  $\int dt f(t - \tau)\delta(t) = f(\tau)$ , substituting a pulse stimulus eliminates the convolution, and together with the initial condition  $\theta(s, t=0) = 0$  leads to:

$$\frac{\partial^2\theta(s, t)}{\partial t\partial s} + \gamma\frac{\partial\theta(s, t)}{\partial s} = -\beta_0\theta_p\mu(t). \quad (4)$$

We now recall that  $\int_0^L ds \frac{df(s)}{ds} = f(L) - f(0)$ . Therefore if we integrate over Eq. 4 we get the following:

$$\frac{\partial\theta(L, t)}{\partial t} - \frac{\partial\theta(0, t)}{\partial t} + \gamma\theta(L, t) - \gamma\theta(0, t) = -\beta_0\theta_p\mu(t) \int_0^L ds. \quad (5)$$

We substitute the clamped boundary conditions,  $\theta(s=0, t) = \frac{\partial\theta(0, t)}{\partial t} = 0$ , and  $\int_0^L ds = L$ , and rearrange the equation, finally leading to Eq. 4:

$$\mu(t) = \frac{1}{L\theta_p\beta_0} \left( \frac{\partial\theta(L, t)}{\partial t} + \gamma\theta(L, t) \right). \quad (6)$$

Moreover, rescaling the characteristic time and length scales in the problem using  $l = L/L_c$ ,  $\tau = t/T_c$  and  $\varphi = \theta(L, t)/\theta_p$ , we can write Eq. 4 yielding:

$$\mu(\tau) = \frac{1}{l} \left( \frac{\partial\varphi(l, \tau)}{\partial \tau} + \varphi(l, \tau) \right), \quad (7)$$

where  $L_c = \gamma/\beta$  is the convergence length, and is given by the decay length of the exponential toward the vertical, and it results from the balance between graviception and proprioception [20].
